# Supplementary material
Source: publisher site journal article supplement (https://www.spandidos-publications.com/7871/downloadSupplementary)
Supplement: Supplementary file 1 [file downloadSupplementary]

## Sheet: Table SVIII
Table VIII. CpG methylation sites for EFNA3 in adrenocortical carcinoma.
Name	Hazard ratio	Confidence interval	P-value	Adjusted P-value	Long -rank test P-value	Best split	CHR	MAPINFO	UCSC RefGene Name	UCSC RefGene Group	Relation to UCSC CpG Island
cg02653559	28.123	(6.595;119.924)	6.5e-06	0.0024	1.9e-11	median	3	147112081	ZIC4	Body	N_Shore
cg03655683	24.401	(5.748;103.581)	1.5e-05	0.0033	1.3e-10	median	2	63281383	OTX1	Body	N_Shore
cg13683040	23.994	(5.668;101.572)	1.6e-05	0.0034	1.4e-10	mean	9	37035766	PAX5	TSS1500	Island
cg11636702	23.431	(3.169;173.266)	0.002	0.032	3.2e-07	mean	4	11370466	MIR572	Body	Island
cg26104752	22.834	(5.386;96.797)	2.2e-05	0.0038	3.5e-10	median	1	119527377	TBX15	5'UTR	S_Shore
cg00084643	22.608	(3.043;167.942)	0.0023	0.035	6.6e-07	mean	5	125936116	PHAX	TSS1500	N_Shore
cg00376553	20.937	(2.843;154.197)	0.0028	0.039	9.6e-07	mean	7	100073281	TSC22D4	Body	N_Shelf
cg18988498	20.509	(4.857;86.592)	3.9e-05	0.0049	1.4e-09	median	11	31824262	PAX6	Body	N_Shore
cg14312661	19.769	(2.684;145.614)	0.0034	0.043	1.9e-06	mean	11	3064385	CARS	Body;5'UTR	Open_Sea
cg22816343	19.707	(2.663;145.832)	0.0035	0.044	2.4e-06	mean	8	26243601	BNIP3L	Body	S_Shelf
cg02699218	19.436	(4.576;82.557)	5.8e-05	0.0057	4.8e-09	mean	5	132150128	ANKRD43	1stExon	Island
cg25239986	19.18	(2.605;141.207)	0.0037	0.045	2.6e-06	mean	2	130794753	LOC440905	Body	Island
cg16322014	19.173	(2.586;142.131)	0.0039	0.046	3.6e-06	mean	11	6518559	DNHD1	5'UTR;1stExon	Open_Sea
cg04378518	19.029	(2.582;140.222)	0.0038	0.046	2.9e-06	mean	20	60585259	TAF4	Body	N_Shelf
cg17970176	18.851	(2.558;138.893)	0.004	0.047	3.2e-06	mean	19	44039345	ZNF575	Body	Island
cg07921371	18.66	(2.497;139.441)	0.0043	0.049	7e-06	q25	13	20768536	GJB2	TSS1500	S_Shore
cg17019053	18.14	(6.097;53.969)	1.9e-07	0.00093	5.5e-11	mean	2	74875263	C2orf65	TSS200	Island
cg16794506	18.07	(2.413;135.306)	0.0048	0.052	1e-05	q25	2	119600002	EN1	3'UTR	Island
cg24837370	17.937	(7.207;44.64)	5.5e-10	0.00021	7.1e-11	q75	2	5833774	SOX11	1stExon	Island
cg00143249	17.725	(2.385;131.724)	0.005	0.053	9.5e-06	q25	7	156798810	MNX1	Body	Island
cg27143842	17.716	(2.407;130.417)	0.0048	0.052	6e-06	mean	12	671027	B4GALNT3	3'UTR	Open_Sea
cg22699074	17.573	(5.067;60.942)	6.3e-06	0.0024	1.8e-09	median	1	6304272	HES3	1stExon;5'UTR	N_Shore
cg19960899	17.543	(2.385;129.021)	0.0049	0.053	6.4e-06	mean	11	44875388	TSPAN18	5'UTR	Open_Sea
cg04995311	17.49	(2.378;128.652)	0.0049	0.053	6.6e-06	mean	19	57630446	USP29	TSS1500	Island
cg12902039	17.407	(2.329;130.103)	0.0054	0.055	1.3e-05	q25	15	28344412	OCA2	1stExon;5'UTR	Island
cg16823083	17.178	(2.3;128.307)	0.0056	0.057	1.5e-05	q25	1	3567412	WDR8	TSS1500	Island
cg24530264	17.165	(2.313;127.37)	0.0054	0.056	1.2e-05	q25	10	135342620	CYP2E1	Body	S_Shore
cg00238770	17.157	(2.307;127.586)	0.0055	0.056	1.3e-05	q25	12	6809215	C12orf53	5'UTR	Island
cg17809494	17.111	(2.295;127.557)	0.0056	0.057	1.5e-05	q25	3	188572244	LPP	Body	Open_Sea
cg09737314	17.074	(2.291;127.213)	0.0056	0.057	1.5e-05	q25	17	6899359	ALOX12	TSS200	Island
cg22474464	17.02	(2.283;126.899)	0.0057	0.057	1.6e-05	q25	20	21492914	NKX2-2	Body	Island
cg17918002	17.017	(2.29;126.434)	0.0056	0.057	1.4e-05	q25	10	28035719	MKX	TSS1500	S_Shore
cg02071795	16.996	(2.31;125.041)	0.0054	0.056	9e-06	mean	14	23442517	JUB	3'UTR	Open_Sea
cg11301556	16.985	(2.27;127.087)	0.0058	0.058	1.8e-05	q25	20	44657798	SLC12A5	TSS200;Body	Island
cg20377305	16.88	(2.275;125.258)	0.0057	0.057	1.4e-05	q25	7	96650668	DLX5	Body	Island
cg21888214	16.568	(2.234;122.899)	0.006	0.059	1.7e-05	q25	1	200992283	KIF21B	Body	Island
cg22675937	16.495	(3.879;70.135)	0.00015	0.0085	5.2e-08	mean	17	59481571	TBX2	Body	Island
cg15402210	16.485	(2.223;122.252)	0.0061	0.06	1.7e-05	q25	2	63274857	LOC100132215	TSS200	Island
cg11893488	16.445	(2.235;121.027)	0.006	0.059	1.3e-05	mean	13	111144464	COL4A2	Body	Open_Sea
cg21851632	16.415	(2.224;121.135)	0.0061	0.059	1.5e-05	mean	12	57540587	LRP1	Body	Open_Sea
cg23299641	16.343	(2.164;123.424)	0.0068	0.063	3.1e-05	q25	X	108868237	KCNE1L	1stExon	Island
cg01474257	16.313	(2.179;122.125)	0.0066	0.062	2.6e-05	q25	17	42030842	PYY	Body	Island
cg05581451	16.305	(2.196;121.084)	0.0064	0.061	2e-05	q25	4	111553999	PITX2	Body	Island
cg09224689	16.291	(2.202;120.547)	0.0063	0.06	1.8e-05	q25	11	31825166	PAX6	Body	N_Shore
cg25053900	16.235	(2.176;121.107)	0.0066	0.062	2.5e-05	q25	X	25033890	ARX	1stExon;5'UTR	Island
cg12262378	16.203	(2.176;120.637)	0.0065	0.062	2.3e-05	q25	17	6899522	ALOX12	1stExon	Island
cg20031900	16.131	(2.181;119.323)	0.0065	0.061	1.9e-05	q25	4	2733908	FAM193A	3'UTR	Island
cg09415272	16.088	(4.822;53.682)	6.2e-06	0.0024	1.6e-09	median	2	88751158	FOXI3	Body	N_Shore
cg24637308	16.033	(2.152;119.422)	0.0068	0.063	2.6e-05	q25	11	6592297	DNHD1	Body	Island
cg09890775	15.974	(2.142;119.134)	0.0069	0.063	2.8e-05	q25	10	131758694	EBF3	Body	Island
cg05783223	15.952	(2.154;118.129)	0.0067	0.063	2.3e-05	q25	1	27961334	FGR	5'UTR	N_Shore
cg14155849	15.947	(4.744;53.607)	7.6e-06	0.0026	2.6e-09	median	1	156722321	HDGF	TSS200;TSS1500	S_Shore
cg03877376	15.927	(2.129;119.169)	0.007	0.064	3.1e-05	q25	12	114846162	TBX5	1stExon;5'UTR	Island
cg15888290	15.926	(2.143;118.365)	0.0068	0.063	2.6e-05	q25	2	119600348	EN1	3'UTR	Island
cg21811143	15.921	(2.142;118.331)	0.0068	0.063	2.6e-05	q25	2	119599748	EN1	3'UTR	Island
cg23842572	15.888	(2.15;117.423)	0.0067	0.063	2.2e-05	q25	17	17030253	MPRIP	Body	Open_Sea
cg27549720	15.885	(2.142;117.807)	0.0068	0.063	2.5e-05	q25	1	19992167	HTR6	5'UTR;1stExon	Island
cg20119487	15.8	(2.134;116.995)	0.0069	0.064	2.5e-05	q25	11	61723124	BEST1	Body	Island
cg08301299	15.785	(3.704;67.271)	0.00019	0.0096	1.1e-07	mean	16	2317849	RNPS1	5'UTR;TSS200	Island
cg04113693	15.764	(2.124;117.012)	0.007	0.064	2.7e-05	q25	1	156890488	C1orf92	1stExon;5'UTR	Island
cg17208528	15.754	(2.131;116.497)	0.0069	0.064	2.4e-05	q25	6	134211114	TCF21	Body	Island
cg13545212	15.746	(2.12;116.949)	0.0071	0.064	2.8e-05	q25	17	6617192	SLC13A5	TSS1500	Island
cg13055001	15.742	(2.124;116.69)	0.007	0.064	2.7e-05	q25	11	67169813	PPP1CA	TSS1500	S_Shore
cg26639039	15.739	(2.12;116.841)	0.007	0.064	2.8e-05	q25	20	44657812	SLC12A5	TSS200;Body	Island
cg04221877	15.731	(3.697;66.932)	0.00019	0.0096	1e-07	mean	1	25257515	RUNX3	TSS1500;Body	Island
cg05812269	15.711	(2.111;116.931)	0.0072	0.065	3e-05	q25	18	21033260	RIOK3	1stExon;5'UTR	Island
cg23553480	15.658	(2.117;115.829)	0.0071	0.064	2.6e-05	q25	2	233925275	INPP5D	1stExon	Island
cg10709021	15.649	(2.116;115.736)	0.0071	0.064	2.6e-05	q25	8	30890108	PURG;WRN	1stExon;TSS1500	Open_Sea
cg09335713	15.544	(2.085;115.858)	0.0074	0.066	3.5e-05	q25	22	42828418	NFAM1	TSS200	Open_Sea
cg04525189	15.532	(2.095;115.143)	0.0073	0.065	3e-05	q25	7	158936508	VIPR2	Body	Island
cg04986781	15.521	(2.096;114.951)	0.0073	0.065	2.9e-05	q25	1	152081317	TCHH	Body	Island
cg02339682	15.49	(2.092;114.679)	0.0073	0.066	3e-05	q25	6	56819432	DST;BEND6	TSS200;TSS1500	Island
cg04278162	15.489	(2.096;114.44)	0.0072	0.065	2.8e-05	q25	6	30182172	TRIM26	TSS1500	Island
cg19861632	15.45	(2.092;114.125)	0.0073	0.066	2.7e-05	mean	4	22392700	GPR125	Body	Open_Sea
cg22305516	15.442	(3.644;65.444)	2e-04	0.0099	1.1e-07	mean	19	4391533	SH3GL1	Body	Open_Sea
cg02344943	15.434	(2.07;115.056)	0.0076	0.067	3.8e-05	q25	5	49737236	EMB	TSS200	Island
cg11616651	15.374	(2.072;114.082)	0.0075	0.067	3.4e-05	q25	19	2251837	AMH	Body	Island
cg14183206	15.373	(3.64;64.925)	2e-04	0.0099	9.5e-08	mean	6	30228169	HLA-L	Body	Island
cg16993043	15.35	(2.077;113.45)	0.0074	0.066	3e-05	q25	1	200008026	NR5A2	Body	N_Shore
cg18866587	15.332	(2.075;113.294)	0.0075	0.066	3e-05	q25	1	16375046	CLCNKB	TSS1500;Body	Open_Sea
cg02583418	15.328	(2.068;113.635)	0.0076	0.067	3.4e-05	q25	2	105473340	POU3F3	1stExon	Island
cg10679688	15.328	(2.062;113.943)	0.0077	0.067	3.7e-05	q25	13	100624965	ZIC5	TSS1500	S_Shore
cg02086467	15.315	(4.573;51.292)	9.6e-06	0.0028	3.9e-09	median	14	57276527	OTX2	5'UTR	Island
cg05697695	15.309	(2.063;113.604)	0.0076	0.067	3.5e-05	q25	19	14584181	PTGER1	Body	Island
cg16401360	15.301	(2.062;113.548)	0.0076	0.067	3.6e-05	q25	10	100993589	HPSE2	Body	N_Shore
cg20057676	15.295	(2.071;112.965)	0.0075	0.067	3.1e-05	q25	13	100637560	ZIC2	Body	S_Shore
cg02286091	15.259	(4.57;50.947)	9.4e-06	0.0028	3.5e-09	mean	5	78407678	BHMT	5'UTR;1stExon	Open_Sea
cg22970003	15.249	(2.047;113.606)	0.0078	0.068	4.1e-05	q25	7	157406032	PTPRN2	Body	Island
cg08129914	15.246	(2.061;112.803)	0.0076	0.067	3.4e-05	q25	1	18962474	PAX7	Body	N_Shore
cg07550362	15.213	(2.049;112.95)	0.0078	0.068	3.8e-05	q25	7	97361201	TAC1	TSS200	Island
cg20345556	15.198	(2.052;112.567)	0.0077	0.068	3.6e-05	q25	6	30175305	TRIM26	5'UTR	Open_Sea
cg03845626	15.163	(2.05;112.139)	0.0077	0.068	3.5e-05	q25	16	1032491	SOX8	Body	Island
cg25621182	15.159	(2.047;112.278)	0.0078	0.068	3.7e-05	q25	1	32135830	COL16A1	Body	Open_Sea
cg14823851	15.154	(2.041;112.481)	0.0079	0.068	3.9e-05	q25	17	59532306	TBX4	TSS1500	Island
cg07816637	15.142	(2.04;112.398)	0.0079	0.068	3.9e-05	q25	5	140782755	PCDHGA4;PCDHGA6;PCDHGA1;PCDHGA8;PCDHGA5;PCDHGB1;PCDHGB4;PCDHGA3;PCDHGA2;PCDHGA9;PCDHGA7;PCDHGB2;PCDHGB5;PCDHGB3	Body;1stExon	S_Shelf
cg04693928	15.118	(2.047;111.675)	0.0078	0.068	3.4e-05	q25	9	129388668	LMX1B	Body	Island
cg16825290	15.077	(2.04;111.424)	0.0078	0.068	3.6e-05	q25	10	100993826	HPSE2	Body	Island
cg14590098	15.054	(2.035;111.379)	0.0079	0.069	3.7e-05	q25	8	65290848	MIR124-2	TSS1500	Island
cg16184803	15.054	(2.027;111.778)	0.008	0.069	4.2e-05	q25	4	111542444	PITX2	Body	Island
cg08738562	15.047	(2.033;111.384)	0.0079	0.069	3.8e-05	q25	1	113259167	PPM1J	TSS1500	S_Shore
cg03845962	0.062	(0.008;0.464)	0.0067	0.063	2.6e-05	q75	3	65880266	MAGI1	Body	Open_Sea
cg13477178	0.065	(0.009;0.479)	0.0073	0.066	3e-05	q75	10	375248	DIP2C	Body	S_Shelf
cg25314624	0.066	(0.009;0.488)	0.0077	0.068	3.4e-05	q75	10	95256917	CEP55	5'UTR	S_Shore
cg14435073	0.07	(0.009;0.523)	0.0096	0.075	7.6e-05	q75	2	236674174	AGAP1	Body	S_Shore
cg19712573	0.07	(0.009;0.52)	0.0093	0.075	6.6e-05	q75	11	133941205	JAM3	Body	S_Shore
cg04796672	0.071	(0.01;0.524)	0.0095	0.075	6.7e-05	q75	3	197883421	FAM157A	Body	N_Shore
cg21909859	0.071	(0.01;0.521)	0.0094	0.075	6.1e-05	q75	8	97345750	PTDSS1	Body	Open_Sea
cg01118900	0.072	(0.01;0.534)	0.01	0.078	9.4e-05	q75	X	100672737	ARMCX4	TSS1500	N_Shore
cg21193071	0.072	(0.01;0.533)	0.01	0.077	7.2e-05	q75	9	131395133	SPTAN1	Body	Open_Sea
cg27073262	0.072	(0.01;0.531)	0.0099	0.077	7.2e-05	q75	7	86493792	GRM3	3'UTR	Open_Sea
cg00471768	0.073	(0.01;0.544)	0.011	0.079	9.3e-05	q75	20	14319125	FLRT3;MACROD2	TSS1500;Body	Open_Sea
cg02930687	0.073	(0.01;0.537)	0.01	0.078	8.2e-05	q75	21	32253206	KRTAP11-1	1stExon;3'UTR	Open_Sea
cg07670566	0.073	(0.01;0.539)	0.01	0.078	8.1e-05	q75	9	139837659	FBXW5	Body	Island
cg17491365	0.073	(0.01;0.541)	0.01	0.078	9e-05	q75	5	109962391	TMEM232	Body	Open_Sea
cg07915976	0.074	(0.01;0.549)	0.011	0.08	9.9e-05	q75	12	54414427	HOXC4;HOXC5;HOXC6	5'UTR;Body	S_Shore
cg15704909	0.075	(0.01;0.552)	0.011	0.081	1e-04	q75	20	57765489	ZNF831	TSS1500	N_Shore
cg16975863	0.075	(0.01;0.552)	0.011	0.081	9.9e-05	q75	4	57548093	HOPX	TSS1500	Open_Sea
cg24113411	0.075	(0.01;0.555)	0.011	0.081	0.00011	q75	X	119737351	MCTS1	TSS1500	Open_Sea
cg02803847	0.076	(0.01;0.561)	0.012	0.082	0.00011	q75	10	124924862	BUB3	3'UTR	Open_Sea
cg06705767	0.076	(0.01;0.558)	0.011	0.082	0.00011	q75	3	25483002	RARB	5'UTR;Body	Open_Sea
cg09001356	0.076	(0.01;0.559)	0.011	0.082	0.00011	q75	17	78797061	RPTOR	Body	N_Shore
cg19125277	0.076	(0.01;0.561)	0.012	0.082	0.00012	q75	4	109097522	LOC641518	Body	S_Shelf
cg21419286	0.076	(0.01;0.562)	0.012	0.082	0.00011	q75	6	170048424	WDR27	Body	Open_Sea
cg22012333	0.076	(0.01;0.564)	0.012	0.083	0.00012	q75	11	118888997	RPS25;TRAPPC4	1stExon;TSS1500;5'UTR	Island
cg01550909	0.077	(0.01;0.565)	0.012	0.083	0.00011	q75	4	123843875	NUDT6;SPATA5	5'UTR;TSS200;TSS1500	N_Shore
cg04912984	0.077	(0.01;0.57)	0.012	0.084	0.00013	q75	1	116184219	VANGL1	TSS1500	N_Shore
cg14047911	0.077	(0.01;0.57)	0.012	0.084	0.00013	q75	6	132858546	TAAR9	TSS1500	Open_Sea
cg14806431	0.077	(0.01;0.566)	0.012	0.083	0.00012	q75	4	174128053	GALNT7	Body	Open_Sea
cg19929852	0.077	(0.01;0.565)	0.012	0.083	0.00012	q75	4	15068643	CPEB2	3'UTR	Open_Sea
cg21167335	0.077	(0.01;0.567)	0.012	0.083	0.00012	q75	9	91267587	LOC286238	TSS1500	Open_Sea
cg25110782	0.077	(0.01;0.568)	0.012	0.083	0.00013	q75	12	57624371	SHMT2	1stExon;5'UTR;Body	S_Shore
cg06413794	0.078	(0.011;0.573)	0.012	0.084	0.00013	q75	12	125595651	AACS	Body	N_Shelf
cg06993714	0.078	(0.011;0.579)	0.013	0.085	0.00015	q75	14	24835343	NFATC4	TSS1500	N_Shore
cg07156219	0.078	(0.011;0.577)	0.012	0.085	0.00014	q75	11	65340282	FAM89B	1stExon	Island
cg10975049	0.078	(0.011;0.575)	0.012	0.085	0.00013	q75	10	72432542	ADAMTS14	TSS200	Island
cg22607751	0.078	(0.011;0.572)	0.012	0.084	0.00013	q75	10	105207135	CALHM2	Body	Open_Sea
cg23095776	0.078	(0.011;0.576)	0.012	0.085	0.00014	q75	19	7991117	CTXN1	TSS200	Island
cg01349409	0.079	(0.011;0.579)	0.013	0.086	0.00015	q75	4	22389746	GPR125	Body	Open_Sea
cg03709468	0.079	(0.011;0.58)	0.013	0.086	0.00014	q75	4	156828285	TDO2	Body	Open_Sea
cg04788956	0.079	(0.011;0.585)	0.013	0.086	0.00016	q75	16	67696138	PARD6A;ACD	Body;TSS1500	S_Shore
cg08845721	0.079	(0.011;0.582)	0.013	0.086	0.00015	q75	5	142780693	NR3C1	5'UTR	N_Shore
cg10784813	0.079	(0.011;0.583)	0.013	0.086	0.00015	q75	16	11348678	SOCS1	3'UTR	Island
cg11622516	0.079	(0.011;0.578)	0.012	0.085	0.00014	q75	3	120165600	FSTL1	Body	N_Shelf
cg15733049	0.079	(0.011;0.58)	0.013	0.086	0.00014	q75	1	2334974	RER1	3'UTR	S_Shore
cg21750659	0.079	(0.011;0.582)	0.013	0.086	0.00015	q75	8	119045287	EXT1	Body	Open_Sea
cg23088508	0.079	(0.011;0.582)	0.013	0.086	0.00015	q75	4	20729211	PACRGL	3'UTR	Open_Sea
cg23300467	0.079	(0.011;0.582)	0.013	0.086	0.00015	q75	14	34180602	NPAS3	Body	Open_Sea
cg23373850	0.079	(0.011;0.583)	0.013	0.086	0.00016	q75	11	75898132	WNT11	Body	Open_Sea
cg25461905	0.079	(0.011;0.579)	0.013	0.085	0.00014	q75	1	178481807	C1orf49	TSS1500	Open_Sea
cg02553520	0.08	(0.011;0.588)	0.013	0.087	0.00017	q75	2	10917815	ATP6V1C2	Body	Open_Sea
cg04600092	0.08	(0.011;0.589)	0.013	0.087	0.00016	q75	7	141811315	LOC93432	TSS1500	Open_Sea
cg07851738	0.08	(0.011;0.588)	0.013	0.087	0.00016	q75	8	131896788	ADCY8	Body	Open_Sea
cg14228980	0.08	(0.011;0.589)	0.013	0.087	0.00016	q75	17	78122221	EIF4A3	TSS1500	S_Shore
cg18268863	0.08	(0.011;0.586)	0.013	0.087	0.00015	q75	11	55650046	SPRYD5	TSS1500	Open_Sea
cg06415573	0.081	(0.011;0.599)	0.014	0.089	0.00019	q75	4	175206575	KIAA1712;FBXO8	5'UTR;TSS1500	S_Shore
cg15999997	0.081	(0.011;0.594)	0.013	0.088	0.00017	q75	3	3885955	LRRN1	5'UTR	Open_Sea
cg00966659	0.082	(0.011;0.601)	0.014	0.089	2e-04	q75	12	10162301	CLEC12B	TSS1500	Open_Sea
cg01618928	0.082	(0.011;0.602)	0.014	0.089	0.00019	q75	17	79870762	PCYT2;SIRT7	TSS1500;Body	S_Shore
cg21266698	0.082	(0.011;0.601)	0.014	0.089	0.00019	q75	1	175130184	KIAA0040	5'UTR	Open_Sea
cg21767191	0.082	(0.011;0.603)	0.014	0.09	0.00021	q75	3	17082105	PLCL2	Body	Open_Sea
cg23917477	0.082	(0.011;0.605)	0.014	0.09	2e-04	q75	12	130334779	TMEM132D	Body	Open_Sea
cg02546607	0.083	(0.011;0.614)	0.015	0.091	0.00022	q75	16	78420476	WWOX	Body	Open_Sea
cg05317498	0.083	(0.011;0.609)	0.014	0.091	0.00022	q75	16	1425256	UNKL	5'UTR	Island
cg17540499	0.083	(0.011;0.614)	0.015	0.091	0.00023	q75	7	126698451	MIR592;GRM8	TSS1500;Body	Open_Sea
cg25565504	0.083	(0.011;0.61)	0.014	0.091	0.00021	q75	2	50876837	NRXN1	Body	Open_Sea
cg25626441	0.083	(0.011;0.614)	0.015	0.092	0.00024	q75	X	77152114	MAGT1	TSS1500	S_Shore
cg14575983	0.084	(0.011;0.621)	0.015	0.093	0.00025	q75	5	99922152	FAM174A	3'UTR	Open_Sea
cg15586632	0.084	(0.011;0.619)	0.015	0.092	0.00024	q75	1	33841922	PHC2	TSS1500	Open_Sea
cg16051114	0.084	(0.011;0.621)	0.015	0.093	0.00025	q75	1	55317188	DHCR24	3'UTR	Open_Sea
cg25175508	0.084	(0.011;0.622)	0.015	0.093	0.00027	q75	20	9820894	PAK7	TSS1500	S_Shore
cg01087463	0.085	(0.012;0.626)	0.016	0.093	0.00027	q75	3	15676638	BTD	Body	Open_Sea
cg08264266	0.085	(0.012;0.628)	0.016	0.094	0.00027	q75	6	124288527	NKAIN2	Body	Open_Sea
cg08340023	0.085	(0.012;0.625)	0.015	0.093	0.00026	q75	16	23098187	USP31	Body	Open_Sea
cg15879620	0.085	(0.012;0.624)	0.015	0.093	0.00026	q75	12	45032094	NELL2	Body	Open_Sea
cg01021224	0.086	(0.012;0.635)	0.016	0.095	0.00029	q75	5	35049428	AGXT2	TSS1500	Open_Sea
cg03823901	0.086	(0.012;0.63)	0.016	0.094	0.00028	q75	11	4615063	OR52I1	TSS1500	Open_Sea
cg08665193	0.086	(0.012;0.633)	0.016	0.094	0.00029	q75	6	168859941	SMOC2	Body	Open_Sea
cg09509503	0.086	(0.012;0.631)	0.016	0.094	0.00028	q75	1	58353581	DAB1	5'UTR	Open_Sea
cg12792526	0.086	(0.012;0.633)	0.016	0.095	0.00029	q75	21	43098958	NCRNA00111	TSS1500	Open_Sea
cg15172728	0.086	(0.012;0.632)	0.016	0.094	0.00029	q75	10	7214443	SFMBT2	Body	S_Shore
cg17385225	0.086	(0.012;0.632)	0.016	0.094	0.00028	q75	X	118750273	SEPT6	3'UTR	Open_Sea
cg18142856	0.086	(0.012;0.63)	0.016	0.094	0.00027	q75	11	7961111	OR10A3	TSS200	Open_Sea
cg18817459	0.086	(0.012;0.636)	0.016	0.095	3e-04	q75	6	107977784	SOBP	3'UTR	Open_Sea
cg20207715	0.086	(0.012;0.631)	0.016	0.094	0.00028	q75	17	77361608	HRNBP3	5'UTR	Open_Sea
cg25238982	0.086	(0.012;0.636)	0.016	0.095	0.00031	q75	13	98893089	FARP1	Body	Open_Sea
cg25912938	0.086	(0.012;0.632)	0.016	0.094	0.00028	q75	21	29910411	NCRNA00161	TSS1500	Open_Sea
cg26775558	0.086	(0.012;0.634)	0.016	0.095	0.00029	q75	10	114867635	TCF7L2	Body	Open_Sea
cg02520816	0.087	(0.012;0.638)	0.016	0.095	0.00031	q75	16	4056403	ADCY9	Body	Open_Sea
cg02588867	0.087	(0.012;0.644)	0.017	0.096	0.00033	q75	X	137951089	FGF13	5'UTR;Body;TSS1500	Open_Sea
cg07771477	0.087	(0.012;0.641)	0.017	0.096	0.00032	q75	13	111142065	COL4A2	Body	Open_Sea
cg16274376	0.087	(0.012;0.64)	0.017	0.096	0.00032	q75	13	21634314	LATS2	5'UTR	N_Shore
cg19825203	0.087	(0.012;0.641)	0.017	0.096	0.00032	q75	5	146207271	PPP2R2B	Body	Open_Sea
cg03614373	0.088	(0.012;0.65)	0.017	0.097	0.00036	q75	16	595904	SOLH	5'UTR	Island
cg09148344	0.088	(0.012;0.649)	0.017	0.097	0.00035	q75	1	7180862	CAMTA1	Body	Open_Sea
cg13663170	0.088	(0.012;0.648)	0.017	0.097	0.00035	q75	4	1976361	WHSC1;SCARNA22	Body;TSS200	Open_Sea
cg18011148	0.088	(0.012;0.645)	0.017	0.097	0.00033	q75	20	237002	DEFB132	TSS1500	Open_Sea
cg18948234	0.088	(0.012;0.646)	0.017	0.097	0.00034	q75	13	114785088	RASA3	Body	N_Shore
cg22327312	0.088	(0.012;0.649)	0.017	0.097	0.00035	q75	11	83985359	DLG2	TSS1500;Body	Open_Sea
cg23058447	0.088	(0.012;0.647)	0.017	0.097	0.00035	q75	7	16437447	ISPD	Body	Open_Sea
cg23735602	0.088	(0.012;0.648)	0.017	0.097	0.00035	q75	3	178276672	KCNMB2	5'UTR;1stExon	Open_Sea
